# Supplementary material for: Air Stabilization of Li7P3S11 Solid-State Electrolytes through Laser-Based Processing
Source: MDPI journal article supplement (doi:10.3390/nano13152210), 2023-07-29
Supplement: s1 [file s1]

# Air Stabilization of $\text{Li}_7\text{P}_3\text{S}_{11}$ Solid State Electrolytes through Laser-Based Processing

Yannick Eatmon<sup>a</sup>, Joseph W. Stiles<sup>b</sup>, Shuichiro Hayashi<sup>c</sup>, Marco Rupp<sup>d</sup>, Craig Arnold<sup>d,e\*</sup>

<sup>a</sup>Department of Chemical and Biological Engineering, Princeton University, Princeton, NJ 08544, USA

<sup>b</sup>Department of Chemistry, Princeton University, Princeton, NJ 08544, USA

<sup>c</sup>School of Integrated Design Engineering, Keio University, Yokohama, Kanagawa, Japan

<sup>d</sup>Department of Mechanical & Aerospace Engineering, Princeton University, Princeton, NJ 08544, USA

<sup>e</sup>Princeton Materials Institute, Princeton University, Princeton, NJ 08544, USA

## Supplementary Information

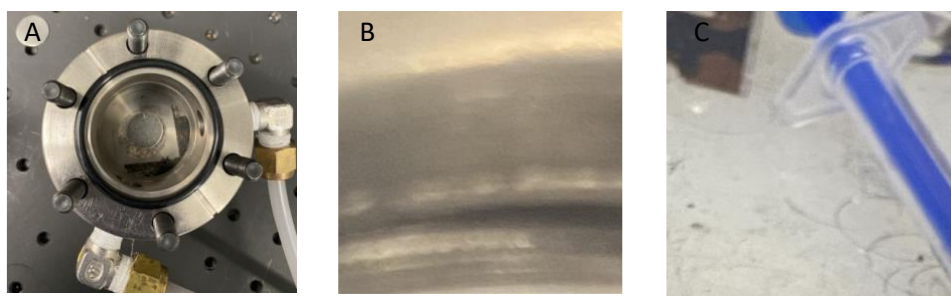

**Figure S1.** (A) Image of portable chamber used for laser processing electrolyte pellets while under Argon atmosphere. (B) Image of a pellet after being laser processed in two perpendicular directions. (C) Image of a laser processed pellet being used to make a symmetric (coin) cell.

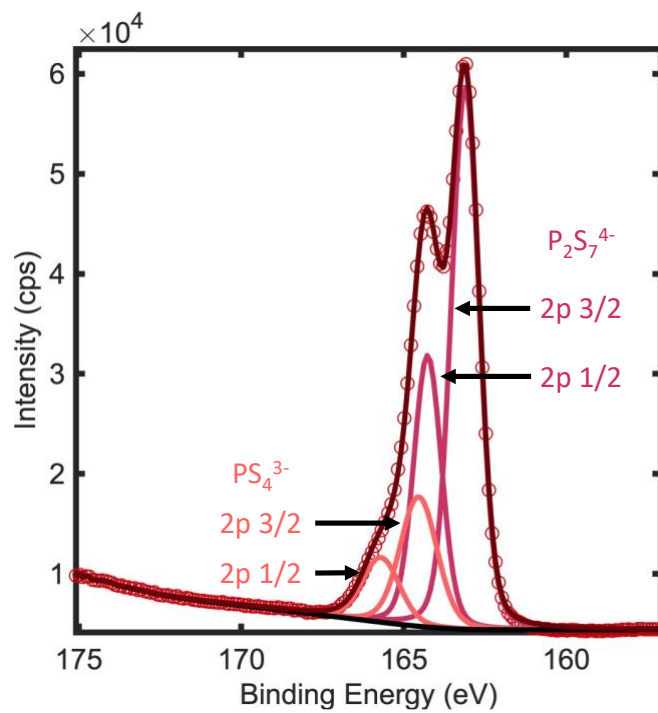

**Figure S2.** Deconvoluted X-ray Photoelectron Spectroscopy spectra of the Sulfur 2p region of  $\text{Li}_7\text{P}_3\text{S}_{11}$  SSE samples. Figure shows the Sulfur  $2p_{3/2}$  and  $1/2$  orbitals.

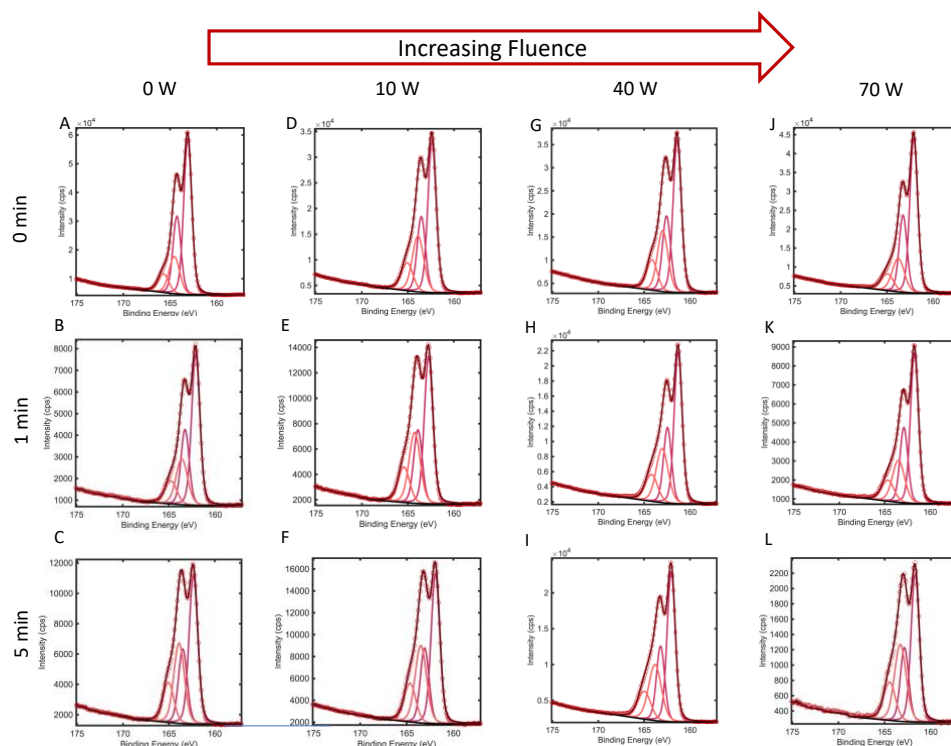

**Figure S3.** Deconvoluted X-ray Photoelectron Spectroscopy spectra of the Sulfur 2p region of  $\text{Li}_7\text{P}_3\text{S}_{11}$  SSE samples. Spectra show the evolution of binding energies as a function of laser processing power and exposure time in air. (A-C) Unprocessed at (A) 0 min, (B) 1 min and (C) 5 min. (D-F) 10W at (D) 0 min, (E) 1 min and (F) 5 min. (G-I) 40W at (G) 0 min, (H) 1 min and (I) 5 min. (J-L) 70W at (J) 0 min, (K) 1 min and (L) 5 min.

|       | 0 W   | 10 W  | 40 W  | 70 W  |
|-------|-------|-------|-------|-------|
| 0 min | 24.1% | 33.8% | 34.0% | 24.8% |
| 1 min | 29.9% | 38.6% | 35.2% | 29.9% |
| 5 min | 39.6% | 40.4% | 36.8% | 42.1% |

**Table S1.** Relative percentage of  $\text{PS}_4^{3-}$  in laser-processed samples as a function of effective laser power and exposure time in air. Relative percentages were calculated based on area under the curve calculations from deconvoluted S 2p XPS spectra (Figure S3). \*Seemingly high initial concentration of  $\text{P}_2\text{S}_7^{4-}$  is attributed to  $\text{P}_2\text{S}_6^{4-}$  production from high power laser treatment and the overlapping peaks for  $\text{P}_2\text{S}_7^{4-}$  and  $\text{P}_2\text{S}_6^{4-}$ .

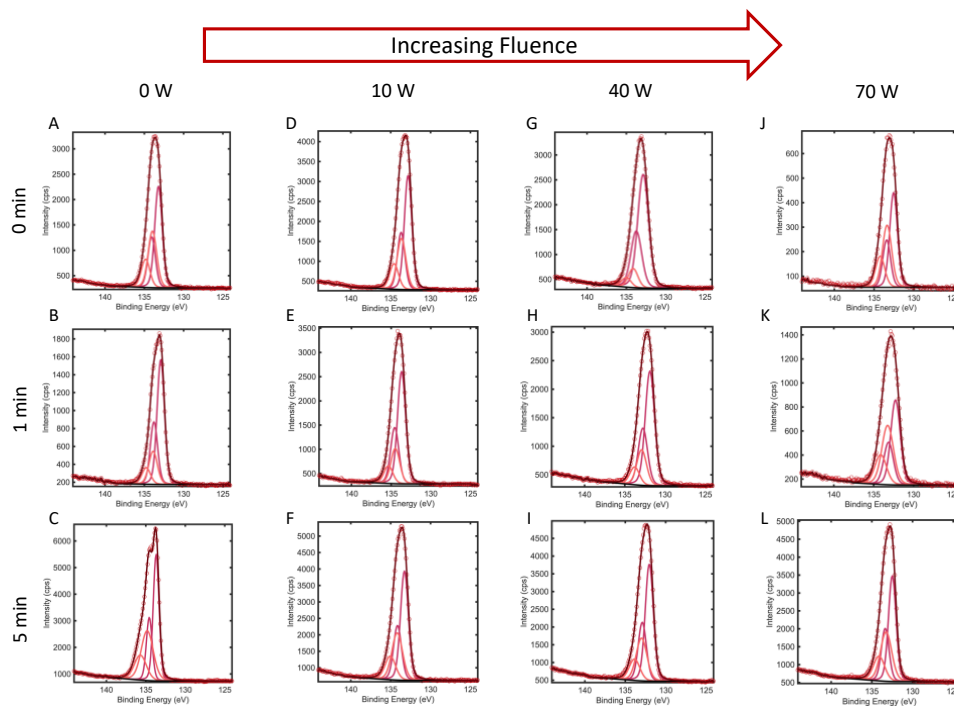

**Figure S4.** Deconvoluted X-ray Photoelectron Spectroscopy spectra of the Phosphorous 2p region of  $\text{Li}_7\text{P}_3\text{S}_{11}$  SSE samples. Spectra show the evolution of binding energies as a function of laser processing power and exposure time in air. (A-C) Unprocessed at (A) 0 min, (B) 1 min and (C) 5 min. (D-F) 10W at (D) 0 min, (E) 1 min and (F) 5 min. (G-I) 40W at (G) 0 min, (H) 1 min and (I) 5 min. (J-L) 70W at (J) 0 min, (K) 1 min and (L) 5 min.

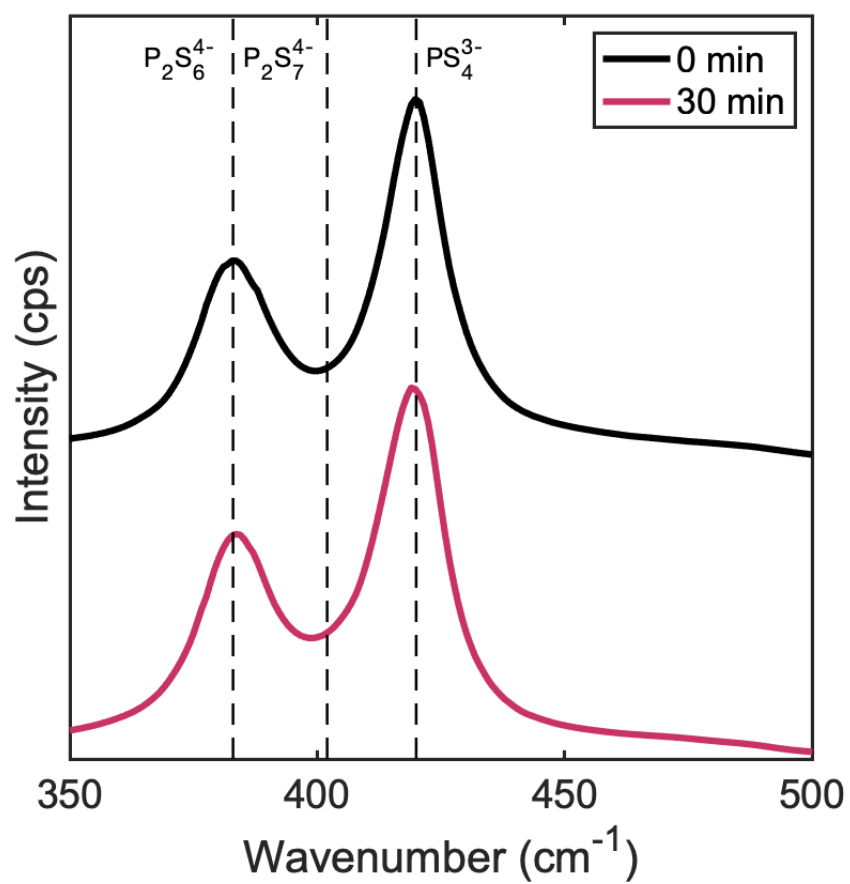

**Figure S5.** Raman Spectra of  $\text{Li}_7\text{P}_3\text{S}_{11}$  pellets as a function of exposure time in air. Samples were processed at a laser power of 25W with a scanning speed of 200mm/s and a 200  $\mu\text{m}$  hatch spacing.
